# Supplementary material
Source: HighWire-hosted journal article supplement (http://www.qdcxjkg.com/highwire/filestream/113615/field_highwire_adjunct_files/3/supplemental_material_e1.pdf)
Supplement: supplemental_material_e1.pdf [file supplemental_material_e1.pdf]

## **Supplemental Material E1**

### **Methods: Sleep Study**

OSA was determined by a full overnight polysomnography (PSG). PSG (Siesta, Compumedics, Melbourne, Australia) included recording of oronasal flow (termistor and cannula), thoracoabdominal movements, electrocardiogram, sub-mental and pre-tibial electromyography, electrooculogram, electroencephalogram, pulse oximetry and body position sensor. Rechtschaffen and Kales' criteria were used for visual scoring of sleep stages. Apnea was defined as a cessation of flow for at least 10 seconds, and hypopnea as any flow reduction of at least 10 seconds, accompanied by a fall of  $\geq 3\%$  in SpO<sub>2</sub> or microarousal. The apnea-hypopnea index (AHI) and the arousal index were defined as the number of apneas/hypopneas and arousals, respectively, per hour of sleep.
